# Supplementary material for: CRISP1 as a novel CatSper regulator that modulates sperm motility and orientation during fertilization
Source: PubMed Central journal article supplement — J Cell Biol. 2015 Sep 28;210(7):1213–24. doi: 10.1083/jcb.201412041 (PMC4586743; doi:10.1083/jcb.201412041), 2015-09-28
Supplement: supp_jcb.201412041_JCB_201412041_sm.pdf [file supp_jcb.201412041_JCB_201412041_sm.pdf]

Ernesto et al., <http://www.jcb.org/cgi/content/full/jcb.2014.12041/DC1>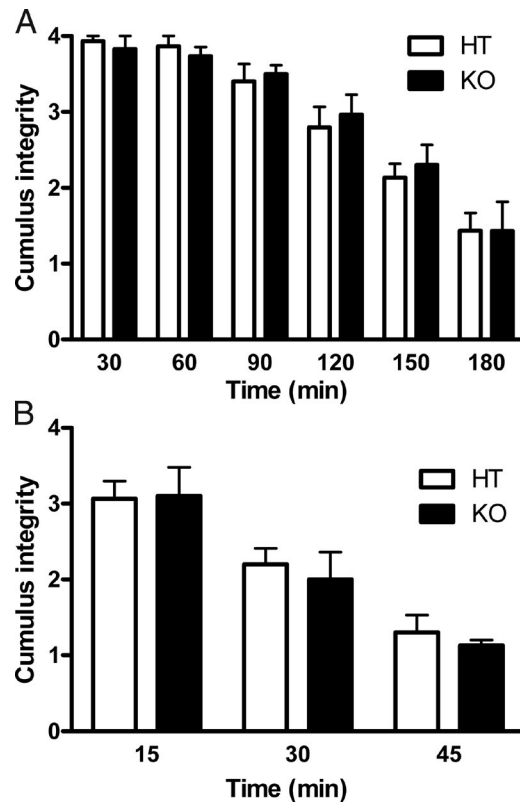

Figure S1. **Effect of CRISP1 on cumulus integrity.** (A) COC from *Crisp1*<sup>+/-</sup> (HT) or *Crisp1*<sup>-/-</sup> (KO) animals were incubated up to 180 min and their integrity was evaluated at different intervals. Cumulus integrity was classified as 4 when COC were intact, as 0 when eggs were completely denuded of cumulus cells, and as 1, 2, or 3 for intermediate stages. (B) COC from *Crisp1*<sup>+/-</sup> and *Crisp1*<sup>-/-</sup> animals were incubated in the presence of hyaluronidase during 15, 30, or 45 min and cumulus integrity was analyzed as described in A. Results represent the mean  $\pm$  SEM of three independent experiments.

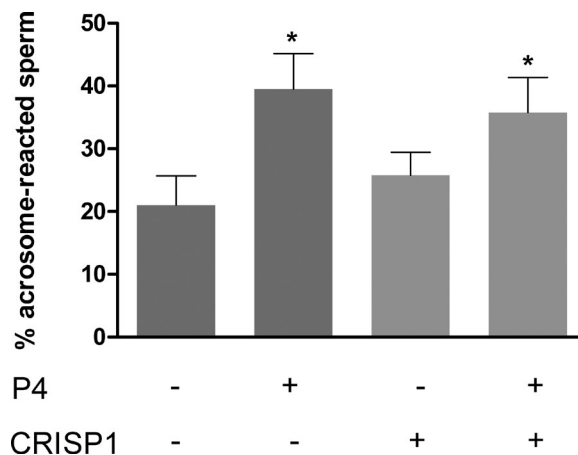

Figure S2. **Effect of CRISP1 on the occurrence of spontaneous or progesterone-induced AR.** Capacitated sperm were exposed to 10  $\mu$ M CRISP1 and/or 15  $\mu$ M progesterone and their acrosomal status was analyzed by staining the cells with Coomassie brilliant blue. Results represent the mean  $\pm$  SEM of four independent experiments in which at least 350 sperm per experiment were analyzed. \*, P < 0.05 vs. control without progesterone.

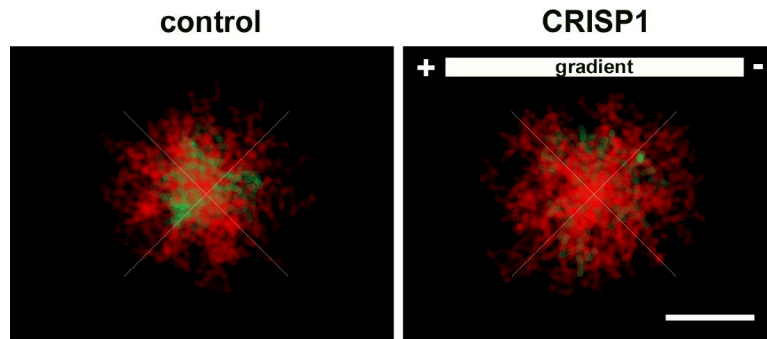

Figure S3. **Trajectories observed for mouse sperm in the modified Zigmond chamber.** All tracked sperm trajectories from a representative experiment were plotted positioning the first point of each trajectory in the origin. Traces were analyzed using the Processing 2 software. Hyperactivated trajectories are represented in green whereas both linear and transitional trajectories are represented in red. (left) Sperm trajectories in medium. (right) Sperm trajectories in a CRISP1 gradient along the x (horizontal) axis. Bar, 100  $\mu$ m.

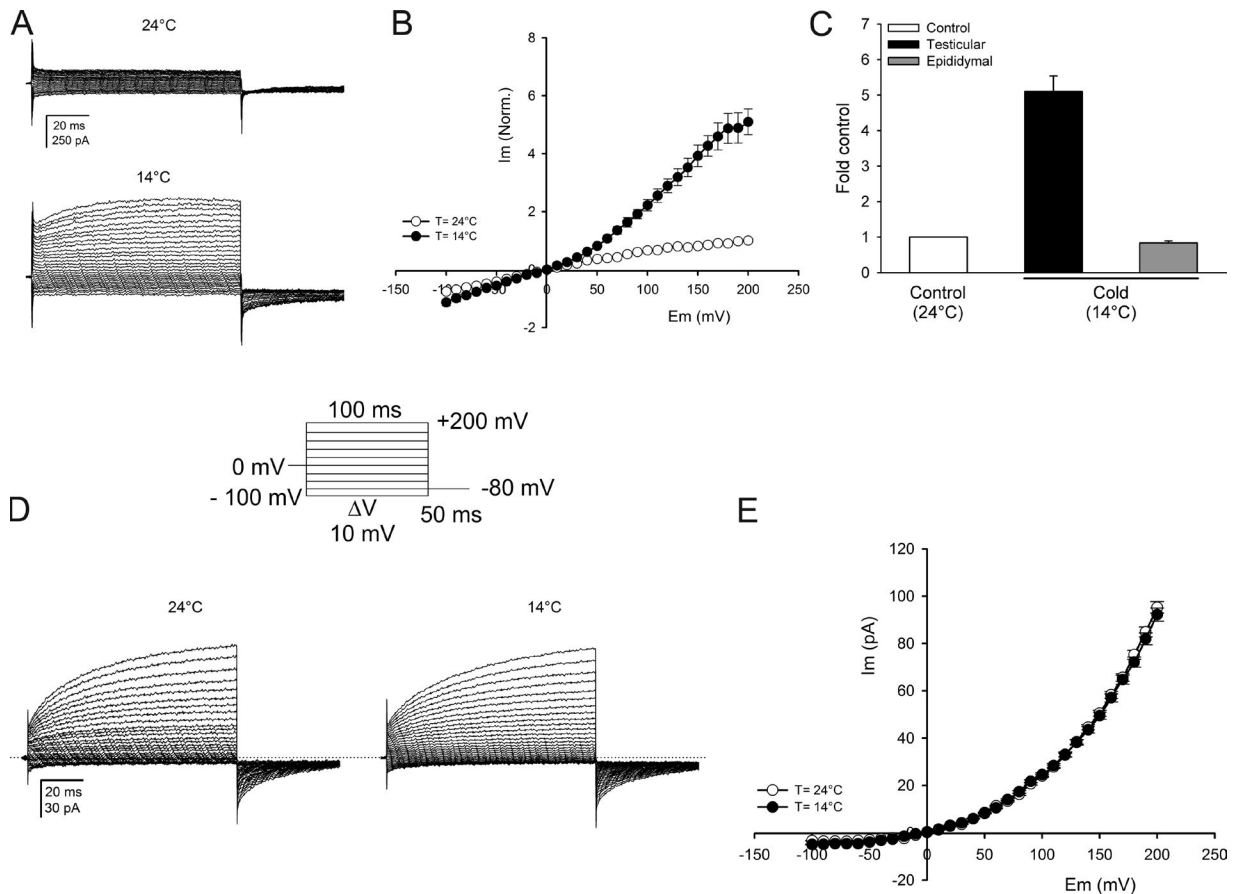

Figure S4. **Cold-activated TRPM8 currents in testicular sperm.** (A) Representative whole-cell currents were measured using TRPM8-recording conditions and the voltage protocol shown in D at the indicated temperatures. The current obtained was responsive to cold temperature and voltage when recorded from testicular sperm. (B) The  $I$ - $V$  relationship shows the cold temperature activated effect on the TRPM8 currents. (C) A temperature change from 24°C to 14°C resulted in a fivefold current activation ( $Q_{10} = 5$ ). Data represent the mean  $\pm$  SEM of four different sperm. (D and E) When epididymal sperm under the same experimental conditions as in A were used, we failed to record cold-activated currents such as those reported previously (Gibbs et al., 2011; Martínez-López et al., 2011).

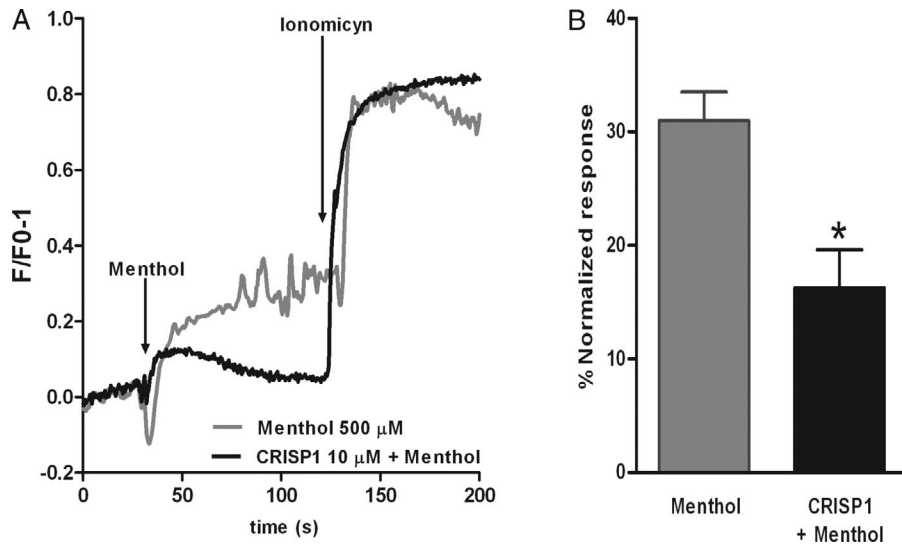

Figure S5. **Effect of CRISP1 on menthol-induced increase in intracellular  $\text{Ca}^{2+}$ .** Motile noncapacitated sperm were loaded with the fluorescent  $\text{Ca}^{2+}$  indicator Fluo-3 AM, and fluorescence intensity was measured before and after addition of menthol (500  $\mu\text{M}$ ). (A) Corresponding representative traces showing the menthol-induced fluorescence changes in the absence or presence of 10  $\mu\text{M}$  CRISP1. Menthol  $[\text{Ca}^{2+}]_i$  responses were observed in  $55 \pm 7\%$  of control sperm ( $n = 3$  independent experiments and 127 cells analyzed). This response was inhibited ( $53.0 \pm 4.3\%$ ;  $n = 3$ ) by 10  $\mu\text{M}$  CRISP1 ( $58 \pm 9\%$  cells responded;  $n = 3$  independent experiments; 103 cells analyzed). (B) Summary of experiments as in A. Intracellular  $\text{Ca}^{2+}$  increases induced by menthol  $\pm$  CRISP1 were normalized with respect to those induced by ionomycin (100%). Data represent the mean  $\pm$  SEM of three independent experiments. \*,  $P < 0.05$  vs. menthol.

Table S1. **Effect of CRISP1 on sperm motility**

| Treatment | VCL               | ALH             | LIN            | VSL              | STR            | VAP               | HA               |
|-----------|-------------------|-----------------|----------------|------------------|----------------|-------------------|------------------|
|           | $\mu\text{m/s}$   | $\mu\text{m/s}$ | %              | $\mu\text{m/s}$  | %              | $\mu\text{m/s}$   | %                |
| Medium    | $226.9 \pm 11.2$  | $4.8 \pm 0.3$   | $27.5 \pm 0.5$ | $59.4 \pm 2.8$   | $50.4 \pm 1.0$ | $117.5 \pm 3.7$   | $24.3 \pm 3.3$   |
| CRISP1    | $198.3 \pm 9.8^a$ | $4.1 \pm 0.2^b$ | $27.2 \pm 0.6$ | $50.8 \pm 3.1^b$ | $47.2 \pm 2.1$ | $109.5 \pm 4.1^c$ | $17.2 \pm 3.3^a$ |

CASA analysis was performed in sperm incubated during the last 15 min of capacitation either in the absence or presence of 10  $\mu\text{M}$  CRISP1. VCL, curvilinear velocity; ALH, amplitude of lateral head displacement; LIN, linearity; VSL, straight line velocity; STR, straightness; VAP, mean path velocity; HA, hyperactivated sperm.  $n = 7$ .

<sup>a</sup> $P < 0.001$  vs. medium.

<sup>b</sup> $P < 0.005$ .

<sup>c</sup> $P < 0.05$ .

## References

- Gibbs, G.M., G. Orta, T. Reddy, A.J. Koppers, P. Martínez-López, J.L. de la Vega-Beltrán, J.C. Lo, N. Veldhuis, D. Jamsai, P. McIntyre, et al. 2011. Cysteine-rich secretory protein 4 is an inhibitor of transient receptor potential M8 with a role in establishing sperm function. *Proc. Natl. Acad. Sci. USA.* 108:7034–7039. <http://dx.doi.org/10.1073/pnas.1015935108>
- Martínez-López, P., C.L. Treviño, J.L. de la Vega-Beltrán, G. De Blas, E. Monroy, C. Beltrán, G. Orta, G.M. Gibbs, M.K. O'Bryan, and A. Darszon. 2011. TRPM8 in mouse sperm detects temperature changes and may influence the acrosome reaction. *J. Cell. Physiol.* 226:1620–1631. <http://dx.doi.org/10.1002/jcp.22493>
